# Supplementary material
Source: Springer Nature journal article supplement (https://www.springermedizin.de/resource/supplementary/12968_2008_57_MOESM10_ESM.pdf/9577892)

slice #2

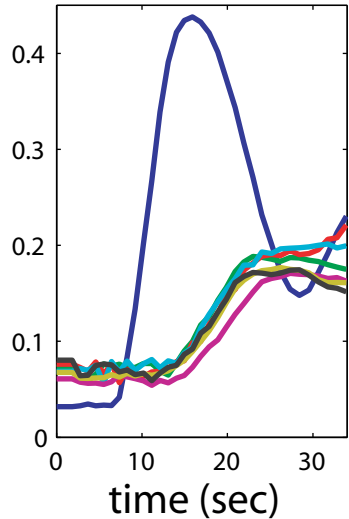

slice #4

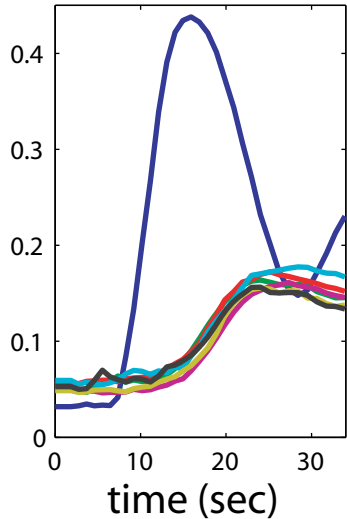

slice #6

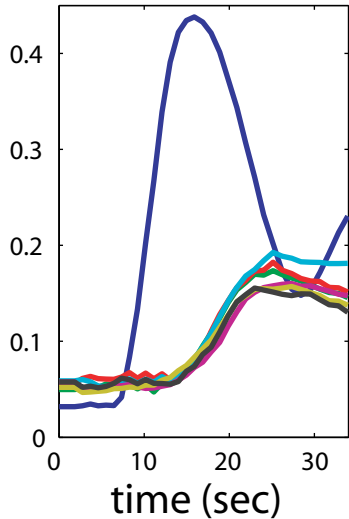

slice #8

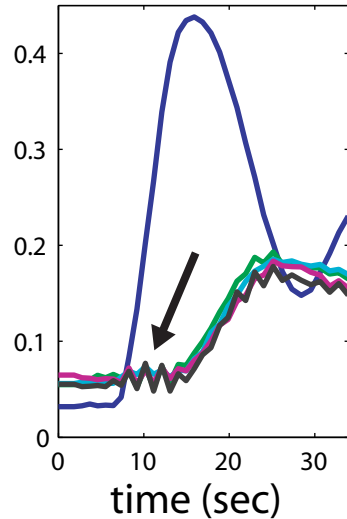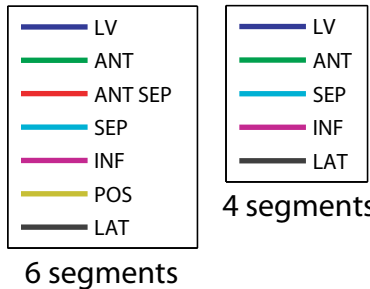

Supplement: MOESM10 [file 9577892]
